# Supplementary material
Source: MDPI journal article supplement (https://www.mdpi.com/2304-6775/4/3/19)
Supplement: s1 [file s1]

**Frequency Table**

| **Age** | | | | | |
| --- | --- | --- | --- | --- | --- |
|  |  | Frequency | Percent | Valid Percent | Cumulative Percent |
| Valid | Under 30 | 26 | 17.6 | 17.6 | 17.6 |
| 30-40 | 69 | 46.6 | 46.6 | 64.2 |
| 41-50 | 33 | 22.3 | 22.3 | 86.5 |
| Above 50 | 20 | 13.5 | 13.5 | 100.0 |
| Total | 148 | 100.0 | 100.0 |  |

| **Faculty** | | | | | |
| --- | --- | --- | --- | --- | --- |
|  |  | Frequency | Percent | Valid Percent | Cumulative Percent |
| Valid | Social work | 19 | 12.8 | 12.8 | 12.8 |
| Geography | 18 | 12.2 | 12.2 | 25.0 |
| Oriental Studies | 22 | 14.9 | 14.9 | 39.9 |
| Anthropology | 11 | 7.4 | 7.4 | 47.3 |
| International Relations | 12 | 8.1 | 8.1 | 55.4 |
| English Linguistics and Literature | 31 | 20.9 | 20.9 | 76.4 |
| Literature and Linguistics | 17 | 11.5 | 11.5 | 87.8 |
| Vietnamese Studies | 18 | 12.2 | 12.2 | 100.0 |
| Total | 148 | 100.0 | 100.0 |  |

| **Qualification** | | | | | |
| --- | --- | --- | --- | --- | --- |
|  |  | Frequency | Percent | Valid Percent | Cumulative Percent |
| Valid | PhD | 46 | 31.1 | 31.1 | 31.1 |
| MA | 92 | 62.2 | 62.2 | 93.2 |
| BA | 10 | 6.8 | 6.8 | 100.0 |
| Total | 148 | 100.0 | 100.0 |  |

| **Education** | | | | | | | | | | |
| --- | --- | --- | --- | --- | --- | --- | --- | --- | --- | --- |
|  |  | | Frequency | | Percent | | Valid Percent | | Cumulative Percent | |
| Valid | Local | | 95 | | 64.2 | | 64.2 | | 64.2 | |
| Overseas | | 53 | | 35.8 | | 35.8 | | 100.0 | |
| Total | | 148 | | 100.0 | | 100.0 | |  | |
| **Main foreign language** | | | | | | | | | |
|  |  | Frequency | | Percent | | Valid Percent | | Cumulative Percent | |
| Valid | English | 133 | | 89.9 | | 89.9 | | 89.9 | |
| French | 1 | | .7 | | .7 | | 90.5 | |
| Chinese | 5 | | 3.4 | | 3.4 | | 93.9 | |
| Other | 9 | | 6.1 | | 6.1 | | 100.0 | |
| Total | 148 | | 100.0 | | 100.0 | |  | |

| **Main FL - Reading** | | | | | |
| --- | --- | --- | --- | --- | --- |
|  |  | Frequency | Percent | Valid Percent | Cumulative Percent |
| Valid | Very low | 1 | .7 | .7 | .7 |
| Low | 1 | .7 | .7 | 1.4 |
| Average | 22 | 14.9 | 14.9 | 16.2 |
| Good | 40 | 27.0 | 27.0 | 43.2 |
| Very good | 84 | 56.8 | 56.8 | 100.0 |
| Total | 148 | 100.0 | 100.0 |  |

| **Main FL - Writing** | | | | | |
| --- | --- | --- | --- | --- | --- |
|  |  | Frequency | Percent | Valid Percent | Cumulative Percent |
| Valid | Very low | 1 | .7 | .7 | .7 |
| Low | 5 | 3.4 | 3.4 | 4.1 |
| Average | 34 | 23.0 | 23.0 | 27.0 |
| Good | 39 | 26.4 | 26.4 | 53.4 |
| Very good | 69 | 46.6 | 46.6 | 100.0 |
| Total | 148 | 100.0 | 100.0 |  |

| **Time for teaching** | | | | | | | | | |
| --- | --- | --- | --- | --- | --- | --- | --- | --- | --- |
|  |  | Frequency | | Percent | | Valid Percent | | Cumulative Percent | |
| Valid | Under 20% | 10 | | 6.8 | | 6.8 | | 6.8 | |
| 20-40% | 21 | | 14.2 | | 14.2 | | 20.9 | |
| 41-60% | 41 | | 27.7 | | 27.7 | | 48.6 | |
| 61-80% | 45 | | 30.4 | | 30.4 | | 79.1 | |
| Above 80% | 31 | | 20.9 | | 20.9 | | 100.0 | |
| Total | 148 | | 100.0 | | 100.0 | |  | |
| **The importance of research** | | | | | | | | | | |
|  |  | | Frequency | | Percent | | Valid Percent | | Cumulative Percent | |
| Valid | Slightly important | | 3 | | 2.0 | | 2.0 | | 2.0 | |
| Moderately important | | 26 | | 17.6 | | 17.6 | | 19.6 | |
| Important | | 87 | | 58.8 | | 58.8 | | 78.4 | |
| Extremely important | | 32 | | 21.6 | | 21.6 | | 100.0 | |
| Total | | 148 | | 100.0 | | 100.0 | |  | |

| **The importance of publishing** | | | | | |
| --- | --- | --- | --- | --- | --- |
|  |  | Frequency | Percent | Valid Percent | Cumulative Percent |
| Valid | Not important | 1 | .7 | .7 | .7 |
| Slightly important | 2 | 1.4 | 1.4 | 2.0 |
| Moderately important | 32 | 21.6 | 21.6 | 23.6 |
| Important | 81 | 54.7 | 54.7 | 78.4 |
| Extremely important | 32 | 21.6 | 21.6 | 100.0 |
| Total | 148 | 100.0 | 100.0 |  |

| **Interest in research** | | | | | |
| --- | --- | --- | --- | --- | --- |
|  |  | Frequency | Percent | Valid Percent | Cumulative Percent |
| Valid | Slightly interested | 4 | 2.7 | 2.7 | 2.7 |
| Moderately interested | 46 | 31.1 | 31.1 | 33.8 |
| Interested | 71 | 48.0 | 48.0 | 81.8 |
| Extremely interested | 27 | 18.2 | 18.2 | 100.0 |
| Total | 148 | 100.0 | 100.0 |  |

| **Interest in publishing** | | | | | |
| --- | --- | --- | --- | --- | --- |
|  |  | Frequency | Percent | Valid Percent | Cumulative Percent |
| Valid | Not interested | 1 | .7 | .7 | .7 |
| Slightly interested | 9 | 6.1 | 6.1 | 6.8 |
| Moderately interested | 46 | 31.1 | 31.1 | 37.8 |
| Interested | 67 | 45.3 | 45.3 | 83.1 |
| Extremely interested | 25 | 16.9 | 16.9 | 100.0 |
| Total | 148 | 100.0 | 100.0 |  |

| **Having participated in research projects** | | | | | |
| --- | --- | --- | --- | --- | --- |
|  |  | Frequency | Percent | Valid Percent | Cumulative Percent |
| Valid | No | 41 | 27.7 | 27.7 | 27.7 |
| Yes | 107 | 72.3 | 72.3 | 100.0 |
| Total | 148 | 100.0 | 100.0 |  |

| **Having been research project leader** | | | | | |
| --- | --- | --- | --- | --- | --- |
|  |  | Frequency | Percent | Valid Percent | Cumulative Percent |
| Valid | No | 90 | 60.8 | 60.8 | 60.8 |
| Yes | 58 | 39.2 | 39.2 | 100.0 |
| Total | 148 | 100.0 | 100.0 |  |

| **Having published** | | | | | |
| --- | --- | --- | --- | --- | --- |
|  |  | Frequency | Percent | Valid Percent | Cumulative Percent |
| Valid | Not published | 36 | 24.3 | 24.3 | 24.3 |
| Having published locally only | 58 | 39.2 | 39.2 | 63.5 |
| Having published Internationally | 54 | 36.5 | 36.5 | 100.0 |
| Total | 148 | 100.0 | 100.0 |  |

| **Having published internationally** | | | | | |
| --- | --- | --- | --- | --- | --- |
|  |  | Frequency | Percent | Valid Percent | Cumulative Percent |
| Valid | No | 94 | 63.5 | 63.5 | 63.5 |
| Yes | 54 | 36.5 | 36.5 | 100.0 |
| Total | 148 | 100.0 | 100.0 |  |

| **Ostacle to local publication - Topic** | | | | | |
| --- | --- | --- | --- | --- | --- |
|  |  | Frequency | Percent | Valid Percent | Cumulative Percent |
| Valid | No obstacle | 27 | 18.2 | 18.2 | 18.2 |
| Little obstacle | 54 | 36.5 | 36.5 | 54.7 |
| Moderate obstacle | 55 | 37.2 | 37.2 | 91.9 |
| Serious obstacle | 11 | 7.4 | 7.4 | 99.3 |
| Very serious obstacle | 1 | .7 | .7 | 100.0 |
| Total | 148 | 100.0 | 100.0 |  |

| **Ostacle to local publication - Resources** | | | | | |
| --- | --- | --- | --- | --- | --- |
|  |  | Frequency | Percent | Valid Percent | Cumulative Percent |
| Valid | No obstacle | 24 | 16.2 | 16.2 | 16.2 |
| Little obstacle | 27 | 18.2 | 18.2 | 34.5 |
| Moderate obstacle | 51 | 34.5 | 34.5 | 68.9 |
| Serious obstacle | 31 | 20.9 | 20.9 | 89.9 |
| Very serious obstacle | 15 | 10.1 | 10.1 | 100.0 |
| Total | 148 | 100.0 | 100.0 |  |

| **Ostacle to local publication - Reading in FL** | | | | | | |
| --- | --- | --- | --- | --- | --- | --- |
|  |  | Frequency | Percent | Valid Percent | Cumulative Percent |
| Valid | No obstacle | 54 | 36.5 | 36.5 | 36.5 |
| Little obstacle | 34 | 23.0 | 23.0 | 59.5 |
| Moderate obstacle | 35 | 23.6 | 23.6 | 83.1 |
| Serious obstacle | 20 | 13.5 | 13.5 | 96.6 |
| Very serious obstacle | 5 | 3.4 | 3.4 | 100.0 |
| Total | 148 | 100.0 | 100.0 |  |

| **Ostacle to local publication - Funding** | | | | | | |
| --- | --- | --- | --- | --- | --- | --- |
|  |  | Frequency | Percent | Valid Percent | Cumulative Percent |
| Valid | No obstacle | 5 | 3.4 | 3.4 | 3.4 |
| Little obstacle | 8 | 5.4 | 5.4 | 8.8 |
| Moderate obstacle | 28 | 18.9 | 18.9 | 27.7 |
| Serious obstacle | 67 | 45.3 | 45.3 | 73.0 |
| Very serious obstacle | 40 | 27.0 | 27.0 | 100.0 |
| Total | 148 | 100.0 | 100.0 |  |

| **Ostacle to local publication - Time for research** | | | | | | |
| --- | --- | --- | --- | --- | --- | --- |
|  |  | Frequency | Percent | Valid Percent | Cumulative Percent |
| Valid | No obstacle | 3 | 2.0 | 2.0 | 2.0 |
| Little obstacle | 14 | 9.5 | 9.5 | 11.5 |
| Moderate obstacle | 36 | 24.3 | 24.3 | 35.8 |
| Serious obstacle | 65 | 43.9 | 43.9 | 79.7 |
| Very serious obstacle | 30 | 20.3 | 20.3 | 100.0 |
| Total | 148 | 100.0 | 100.0 |  |

| **Ostacle to local publication - Time for writing** | | | | | | |
| --- | --- | --- | --- | --- | --- | --- |
|  |  | Frequency | Percent | Valid Percent | Cumulative Percent |
| Valid | No obstacle | 4 | 2.7 | 2.7 | 2.7 |
| Little obstacle | 19 | 12.8 | 12.8 | 15.5 |
| Moderate obstacle | 42 | 28.4 | 28.4 | 43.9 |
| Serious obstacle | 59 | 39.9 | 39.9 | 83.8 |
| Very serious obstacle | 24 | 16.2 | 16.2 | 100.0 |
| Total | 148 | 100.0 | 100.0 |  |

| **Ostacle to local publication - Writing techniques** | | | | | | |
| --- | --- | --- | --- | --- | --- | --- |
|  |  | Frequency | Percent | Valid Percent | Cumulative Percent |
| Valid | No obstacle | 29 | 19.6 | 19.6 | 19.6 |
| Little obstacle | 48 | 32.4 | 32.4 | 52.0 |
| Moderate obstacle | 46 | 31.1 | 31.1 | 83.1 |
| Serious obstacle | 22 | 14.9 | 14.9 | 98.0 |
| Very serious obstacle | 3 | 2.0 | 2.0 | 100.0 |
| Total | 148 | 100.0 | 100.0 |  |

| **Ostacle to local publication - Data analysis techniques** | | | | | | |
| --- | --- | --- | --- | --- | --- | --- |
|  |  | Frequency | Percent | Valid Percent | Cumulative Percent |
| Valid | No obstacle | 33 | 22.3 | 22.3 | 22.3 |
| Little obstacle | 41 | 27.7 | 27.7 | 50.0 |
| Moderate obstacle | 47 | 31.8 | 31.8 | 81.8 |
| Serious obstacle | 23 | 15.5 | 15.5 | 97.3 |
| Very serious obstacle | 4 | 2.7 | 2.7 | 100.0 |
| Total | 148 | 100.0 | 100.0 |  |

| **Ostacle to local publication - Finding appropriate journal for publication** | | | | | | |
| --- | --- | --- | --- | --- | --- | --- |
|  |  | Frequency | Percent | Valid Percent | Cumulative Percent |
| Valid | No obstacle | 14 | 9.5 | 9.5 | 9.5 |
| Little obstacle | 34 | 23.0 | 23.0 | 32.4 |
| Moderate obstacle | 49 | 33.1 | 33.1 | 65.5 |
| Serious obstacle | 38 | 25.7 | 25.7 | 91.2 |
| Very serious obstacle | 13 | 8.8 | 8.8 | 100.0 |
| Total | 148 | 100.0 | 100.0 |  |

| **Ostacle to international publication - Topic** | | | | | |
| --- | --- | --- | --- | --- | --- |
|  |  | Frequency | Percent | Valid Percent | Cumulative Percent |
| Valid | No obstacle | 21 | 14.2 | 14.2 | 14.2 |
| Little obstacle | 18 | 12.2 | 12.2 | 26.4 |
| Moderate obstacle | 53 | 35.8 | 35.8 | 62.2 |
| Serious obstacle | 42 | 28.4 | 28.4 | 90.5 |
| Very serious obstacle | 14 | 9.5 | 9.5 | 100.0 |
| Total | 148 | 100.0 | 100.0 |  |

| **Ostacle to international publication - Resources** | | | | | | |
| --- | --- | --- | --- | --- | --- | --- |
|  |  | Frequency | Percent | Valid Percent | Cumulative Percent |
| Valid | No obstacle | 18 | 12.2 | 12.2 | 12.2 |
| Little obstacle | 20 | 13.5 | 13.5 | 25.7 |
| Moderate obstacle | 43 | 29.1 | 29.1 | 54.7 |
| Serious obstacle | 45 | 30.4 | 30.4 | 85.1 |
| Very serious obstacle | 22 | 14.9 | 14.9 | 100.0 |
| Total | 148 | 100.0 | 100.0 |  |

| **Ostacle to international publication - Reading in FL** | | | | | | |
| --- | --- | --- | --- | --- | --- | --- |
|  |  | Frequency | Percent | Valid Percent | Cumulative Percent |
| Valid | No obstacle | 44 | 29.7 | 29.7 | 29.7 |
| Little obstacle | 40 | 27.0 | 27.0 | 56.8 |
| Moderate obstacle | 24 | 16.2 | 16.2 | 73.0 |
| Serious obstacle | 25 | 16.9 | 16.9 | 89.9 |
| Very serious obstacle | 15 | 10.1 | 10.1 | 100.0 |
| Total | 148 | 100.0 | 100.0 |  |

| **Ostacle to international publication - Writing in FL** | | | | | | |
| --- | --- | --- | --- | --- | --- | --- |
|  |  | Frequency | Percent | Valid Percent | Cumulative Percent |
| Valid | No obstacle | 28 | 18.9 | 18.9 | 18.9 |
| Little obstacle | 27 | 18.2 | 18.2 | 37.2 |
| Moderate obstacle | 32 | 21.6 | 21.6 | 58.8 |
| Serious obstacle | 31 | 20.9 | 20.9 | 79.7 |
| Very serious obstacle | 30 | 20.3 | 20.3 | 100.0 |
| Total | 148 | 100.0 | 100.0 |  |

| **Ostacle to international publication - Funding** | | | | | |
| --- | --- | --- | --- | --- | --- |
|  |  | Frequency | Percent | Valid Percent | Cumulative Percent |
| Valid | No obstacle | 1 | .7 | .7 | .7 |
| Little obstacle | 7 | 4.7 | 4.7 | 5.4 |
| Moderate obstacle | 29 | 19.6 | 19.6 | 25.0 |
| Serious obstacle | 62 | 41.9 | 41.9 | 66.9 |
| Very serious obstacle | 49 | 33.1 | 33.1 | 100.0 |
| Total | 148 | 100.0 | 100.0 |  |

| **Ostacle to international publication - Time for research** | | | | | |
| --- | --- | --- | --- | --- | --- |
|  |  | Frequency | Percent | Valid Percent | Cumulative Percent |
| Valid | No obstacle | 3 | 2.0 | 2.0 | 2.0 |
| Little obstacle | 9 | 6.1 | 6.1 | 8.1 |
| Moderate obstacle | 43 | 29.1 | 29.1 | 37.2 |
| Serious obstacle | 61 | 41.2 | 41.2 | 78.4 |
| Very serious obstacle | 32 | 21.6 | 21.6 | 100.0 |
| Total | 148 | 100.0 | 100.0 |  |

| **Ostacle to international publication - Time for writing** | | | | | |
| --- | --- | --- | --- | --- | --- |
|  |  | Frequency | Percent | Valid Percent | Cumulative Percent |
| Valid | No obstacle | 3 | 2.0 | 2.0 | 2.0 |
| Little obstacle | 11 | 7.4 | 7.4 | 9.5 |
| Moderate obstacle | 49 | 33.1 | 33.1 | 42.6 |
| Serious obstacle | 56 | 37.8 | 37.8 | 80.4 |
| Very serious obstacle | 29 | 19.6 | 19.6 | 100.0 |
| Total | 148 | 100.0 | 100.0 |  |

| **Ostacle to international publication - Writing techniques** | | | | | |
| --- | --- | --- | --- | --- | --- |
|  |  | Frequency | Percent | Valid Percent | Cumulative Percent |
| Valid | No obstacle | 18 | 12.2 | 12.2 | 12.2 |
| Little obstacle | 25 | 16.9 | 16.9 | 29.1 |
| Moderate obstacle | 50 | 33.8 | 33.8 | 62.8 |
| Serious obstacle | 33 | 22.3 | 22.3 | 85.1 |
| Very serious obstacle | 22 | 14.9 | 14.9 | 100.0 |
| Total | 148 | 100.0 | 100.0 |  |

| **Ostacle to international publication - Data analysis techniques** | | | | | |
| --- | --- | --- | --- | --- | --- |
|  |  | Frequency | Percent | Valid Percent | Cumulative Percent |
| Valid | No obstacle | 21 | 14.2 | 14.2 | 14.2 |
| Little obstacle | 30 | 20.3 | 20.3 | 34.5 |
| Moderate obstacle | 51 | 34.5 | 34.5 | 68.9 |
| Serious obstacle | 32 | 21.6 | 21.6 | 90.5 |
| Very serious obstacle | 14 | 9.5 | 9.5 | 100.0 |
| Total | 148 | 100.0 | 100.0 |  |

| **Ostacle to international publication - Finding appropriate journal for publication** | | | | | |
| --- | --- | --- | --- | --- | --- |
|  |  | Frequency | Percent | Valid Percent | Cumulative Percent |
| Valid | No obstacle | 8 | 5.4 | 5.4 | 5.4 |
| Little obstacle | 15 | 10.1 | 10.1 | 15.5 |
| Moderate obstacle | 42 | 28.4 | 28.4 | 43.9 |
| Serious obstacle | 47 | 31.8 | 31.8 | 75.7 |
| Very serious obstacle | 36 | 24.3 | 24.3 | 100.0 |
| Total | 148 | 100.0 | 100.0 |  |

**Frequency Table**

| **The importance of research** | | | | | |
| --- | --- | --- | --- | --- | --- |
|  |  | Frequency | Percent | Valid Percent | Cumulative Percent |
| Valid | Slightly important | 3 | 2.0 | 2.0 | 2.0 |
| Moderately important | 26 | 17.6 | 17.6 | 19.6 |
| Important | 87 | 58.8 | 58.8 | 78.4 |
| Extremely important | 32 | 21.6 | 21.6 | 100.0 |
| Total | 148 | 100.0 | 100.0 |  |

| **The importance of publishing** | | | | | |
| --- | --- | --- | --- | --- | --- |
|  |  | Frequency | Percent | Valid Percent | Cumulative Percent |
| Valid | Not important | 1 | .7 | .7 | .7 |
| Slightly important | 2 | 1.4 | 1.4 | 2.0 |
| Moderately important | 32 | 21.6 | 21.6 | 23.6 |
| Important | 81 | 54.7 | 54.7 | 78.4 |
| Extremely important | 32 | 21.6 | 21.6 | 100.0 |
| Total | 148 | 100.0 | 100.0 |  |

| **Interest in research** | | | | | |
| --- | --- | --- | --- | --- | --- |
|  |  | Frequency | Percent | Valid Percent | Cumulative Percent |
| Valid | Slightly interested | 4 | 2.7 | 2.7 | 2.7 |
| Moderately interested | 46 | 31.1 | 31.1 | 33.8 |
| Interested | 71 | 48.0 | 48.0 | 81.8 |
| Extremely interested | 27 | 18.2 | 18.2 | 100.0 |
| Total | 148 | 100.0 | 100.0 |  |

| **Interest in publishing** | | | | | |
| --- | --- | --- | --- | --- | --- |
|  |  | Frequency | Percent | Valid Percent | Cumulative Percent |
| Valid | Not interested | 1 | .7 | .7 | .7 |
| Slightly interested | 9 | 6.1 | 6.1 | 6.8 |
| Moderately interested | 46 | 31.1 | 31.1 | 37.8 |
| Interested | 67 | 45.3 | 45.3 | 83.1 |
| Extremely interested | 25 | 16.9 | 16.9 | 100.0 |
| Total | 148 | 100.0 | 100.0 |  |

| **Descriptives** | | | | | | | | | |
| --- | --- | --- | --- | --- | --- | --- | --- | --- | --- |
|  |  | N | Mean | Std. Deviation | Std. Error | 95% Confidence Interval for Mean | | Minimum | Maximum |
|  |  | Lower Bound | Upper Bound |
| The importance of research | Social work | 19 | 4.0526 | .70504 | .16175 | 3.7128 | 4.3924 | 3.00 | 5.00 |
| Geography | 18 | 4.1667 | .61835 | .14575 | 3.8592 | 4.4742 | 3.00 | 5.00 |
| Oriental Studies | 22 | 3.7727 | .86914 | .18530 | 3.3874 | 4.1581 | 2.00 | 5.00 |
| Anthropology | 11 | 4.0909 | .30151 | .09091 | 3.8884 | 4.2935 | 4.00 | 5.00 |
| International Relations | 12 | 3.8333 | .71774 | .20719 | 3.3773 | 4.2894 | 3.00 | 5.00 |
| English Linguistics and Literature | 31 | 3.8710 | .80589 | .14474 | 3.5754 | 4.1666 | 2.00 | 5.00 |
| Literature and Linguistics | 17 | 4.1176 | .60025 | .14558 | 3.8090 | 4.4263 | 3.00 | 5.00 |
| Vietnamese Studies | 18 | 4.2222 | .42779 | .10083 | 4.0095 | 4.4350 | 4.00 | 5.00 |
| Total | 148 | 4.0000 | .69007 | .05672 | 3.8879 | 4.1121 | 2.00 | 5.00 |
| The importance of publishing | Social work | 19 | 4.1053 | .73747 | .16919 | 3.7498 | 4.4607 | 3.00 | 5.00 |
| Geography | 18 | 4.2778 | .57451 | .13541 | 3.9921 | 4.5635 | 3.00 | 5.00 |
| Oriental Studies | 22 | 3.8636 | .94089 | .20060 | 3.4465 | 4.2808 | 2.00 | 5.00 |
| Anthropology | 11 | 4.1818 | .40452 | .12197 | 3.9101 | 4.4536 | 4.00 | 5.00 |
| International Relations | 12 | 3.7500 | .62158 | .17944 | 3.3551 | 4.1449 | 3.00 | 5.00 |
| English Linguistics and Literature | 31 | 3.6452 | .91464 | .16427 | 3.3097 | 3.9807 | 1.00 | 5.00 |
| Literature and Linguistics | 17 | 3.9412 | .65865 | .15975 | 3.6025 | 4.2798 | 3.00 | 5.00 |
| Vietnamese Studies | 18 | 4.1111 | .32338 | .07622 | 3.9503 | 4.2719 | 4.00 | 5.00 |
| Total | 148 | 3.9527 | .74079 | .06089 | 3.8324 | 4.0730 | 1.00 | 5.00 |
| Interest in research | Social work | 19 | 4.1053 | .65784 | .15092 | 3.7882 | 4.4223 | 3.00 | 5.00 |
| Geography | 18 | 4.1111 | .67640 | .15943 | 3.7747 | 4.4475 | 3.00 | 5.00 |
| Oriental Studies | 22 | 3.5909 | .90812 | .19361 | 3.1883 | 3.9935 | 2.00 | 5.00 |
| Anthropology | 11 | 3.7273 | .64667 | .19498 | 3.2928 | 4.1617 | 3.00 | 5.00 |
| International Relations | 12 | 3.8333 | .71774 | .20719 | 3.3773 | 4.2894 | 3.00 | 5.00 |
| English Linguistics and Literature | 31 | 3.5806 | .88597 | .15913 | 3.2557 | 3.9056 | 2.00 | 5.00 |
| Literature and Linguistics | 17 | 3.9412 | .55572 | .13478 | 3.6555 | 4.2269 | 3.00 | 5.00 |
| Vietnamese Studies | 18 | 3.8333 | .61835 | .14575 | 3.5258 | 4.1408 | 3.00 | 5.00 |
| Total | 148 | 3.8176 | .75626 | .06216 | 3.6947 | 3.9404 | 2.00 | 5.00 |
| Interest in publishing | Social work | 19 | 4.1053 | .65784 | .15092 | 3.7882 | 4.4223 | 3.00 | 5.00 |
| Geography | 18 | 4.0556 | .72536 | .17097 | 3.6948 | 4.4163 | 3.00 | 5.00 |
| Oriental Studies | 22 | 3.5909 | .95912 | .20449 | 3.1657 | 4.0162 | 2.00 | 5.00 |
| Anthropology | 11 | 3.6364 | .92442 | .27872 | 3.0153 | 4.2574 | 2.00 | 5.00 |
| International Relations | 12 | 3.5833 | .51493 | .14865 | 3.2562 | 3.9105 | 3.00 | 4.00 |
| English Linguistics and Literature | 31 | 3.3548 | 1.01812 | .18286 | 2.9814 | 3.7283 | 1.00 | 5.00 |
| Literature and Linguistics | 17 | 3.8824 | .78121 | .18947 | 3.4807 | 4.2840 | 2.00 | 5.00 |
| Vietnamese Studies | 18 | 3.7222 | .57451 | .13541 | 3.4365 | 4.0079 | 3.00 | 5.00 |
| Total | 148 | 3.7162 | .84145 | .06917 | 3.5795 | 3.8529 | 1.00 | 5.00 |

| **Test of Homogeneity of Variances** | | | | |
| --- | --- | --- | --- | --- |
|  | Levene Statistic | df1 | df2 | Sig. |
| The importance of research | 2.344 | 7 | 140 | .027 |
| The importance of publishing | 4.567 | 7 | 140 | .000 |
| Interest in research | 2.856 | 7 | 140 | .008 |
| Interest in publishing | 2.620 | 7 | 140 | .014 |

| **ANOVA** | | | | | | |
| --- | --- | --- | --- | --- | --- | --- |
|  |  | Sum of Squares | df | Mean Square | F | Sig. |
| The importance of research | Between Groups | 3.754 | 7 | .536 | 1.133 | .346 |
| Within Groups | 66.246 | 140 | .473 |  |  |
| Total | 70.000 | 147 |  |  |  |
| The importance of publishing | Between Groups | 6.975 | 7 | .996 | 1.893 | .075 |
| Within Groups | 73.694 | 140 | .526 |  |  |
| Total | 80.669 | 147 |  |  |  |
| Interest in research | Between Groups | 6.351 | 7 | .907 | 1.634 | .131 |
| Within Groups | 77.723 | 140 | .555 |  |  |
| Total | 84.074 | 147 |  |  |  |
| Interest in publishing | Between Groups | 10.094 | 7 | 1.442 | 2.148 | .042 |
| Within Groups | 93.987 | 140 | .671 |  |  |
| Total | 104.081 | 147 |  |  |  |

| **Robust Tests of Equality of Means** | | | | | |
| --- | --- | --- | --- | --- | --- |
|  |  | Statistica | df1 | df2 | Sig. |
| The importance of research | Welch | 1.153 | 7 | 54.737 | .345 |
| Brown-Forsythe | 1.267 | 7 | 117.828 | .273 |
| The importance of publishing | Welch | 1.986 | 7 | 53.647 | .074 |
| Brown-Forsythe | 2.206 | 7 | 121.107 | .038 |
| Interest in research | Welch | 1.462 | 7 | 53.299 | .201 |
| Brown-Forsythe | 1.778 | 7 | 127.072 | .097 |
| Interest in publishing | Welch | 2.116 | 7 | 53.556 | .057 |
| Brown-Forsythe | 2.344 | 7 | 113.645 | .028 |
| a. Asymptotically F distributed. | |  |  |  |  |

| **Descriptives** | | | | | | | | | |
| --- | --- | --- | --- | --- | --- | --- | --- | --- | --- |
|  |  | N | Mean | Std. Deviation | Std. Error | 95% Confidence Interval for Mean | | Minimum | Maximum |
|  |  | Lower Bound | Upper Bound |
| The importance of research | PhD | 46 | 4.2174 | .69644 | .10268 | 4.0106 | 4.4242 | 3.00 | 5.00 |
| MA | 92 | 3.9565 | .64473 | .06722 | 3.8230 | 4.0900 | 2.00 | 5.00 |
| BA | 10 | 3.4000 | .69921 | .22111 | 2.8998 | 3.9002 | 2.00 | 4.00 |
| Total | 148 | 4.0000 | .69007 | .05672 | 3.8879 | 4.1121 | 2.00 | 5.00 |
| The importance of publishing | PhD | 46 | 4.1304 | .74859 | .11037 | 3.9081 | 4.3527 | 3.00 | 5.00 |
| MA | 92 | 3.9239 | .71458 | .07450 | 3.7759 | 4.0719 | 1.00 | 5.00 |
| BA | 10 | 3.4000 | .69921 | .22111 | 2.8998 | 3.9002 | 2.00 | 4.00 |
| Total | 148 | 3.9527 | .74079 | .06089 | 3.8324 | 4.0730 | 1.00 | 5.00 |
| Interest in research | PhD | 46 | 4.1522 | .66558 | .09813 | 3.9545 | 4.3498 | 3.00 | 5.00 |
| MA | 92 | 3.7391 | .73931 | .07708 | 3.5860 | 3.8922 | 2.00 | 5.00 |
| BA | 10 | 3.0000 | .47140 | .14907 | 2.6628 | 3.3372 | 2.00 | 4.00 |
| Total | 148 | 3.8176 | .75626 | .06216 | 3.6947 | 3.9404 | 2.00 | 5.00 |
| Interest in publishing | PhD | 46 | 4.0652 | .74243 | .10947 | 3.8447 | 4.2857 | 3.00 | 5.00 |
| MA | 92 | 3.6196 | .83656 | .08722 | 3.4463 | 3.7928 | 1.00 | 5.00 |
| BA | 10 | 3.0000 | .66667 | .21082 | 2.5231 | 3.4769 | 2.00 | 4.00 |
| Total | 148 | 3.7162 | .84145 | .06917 | 3.5795 | 3.8529 | 1.00 | 5.00 |

| **Test of Homogeneity of Variances** | | | | |
| --- | --- | --- | --- | --- |
|  | Levene Statistic | df1 | df2 | Sig. |
| The importance of research | 2.845 | 2 | 145 | .061 |
| The importance of publishing | 1.333 | 2 | 145 | .267 |
| Interest in research | 4.782 | 2 | 145 | .010 |
| Interest in publishing | 2.455 | 2 | 145 | .089 |

| **ANOVA** | | | | | | |
| --- | --- | --- | --- | --- | --- | --- |
|  |  | Sum of Squares | df | Mean Square | F | Sig. |
| The importance of research | Between Groups | 5.948 | 2 | 2.974 | 6.732 | .002 |
| Within Groups | 64.052 | 145 | .442 |  |  |
| Total | 70.000 | 147 |  |  |  |
| The importance of publishing | Between Groups | 4.584 | 2 | 2.292 | 4.368 | .014 |
| Within Groups | 76.085 | 145 | .525 |  |  |
| Total | 80.669 | 147 |  |  |  |
| Interest in research | Between Groups | 12.400 | 2 | 6.200 | 12.543 | .000 |
| Within Groups | 71.674 | 145 | .494 |  |  |
| Total | 84.074 | 147 |  |  |  |
| Interest in publishing | Between Groups | 11.592 | 2 | 5.796 | 9.087 | .000 |
| Within Groups | 92.489 | 145 | .638 |  |  |
| Total | 104.081 | 147 |  |  |  |

| **Robust Tests of Equality of Means** | | | | | |
| --- | --- | --- | --- | --- | --- |
|  |  | Statistica | df1 | df2 | Sig. |
| The importance of research | Welch | 5.964 | 2 | 24.074 | .008 |
| Brown-Forsythe | 6.278 | 2 | 34.731 | .005 |
| The importance of publishing | Welch | 4.371 | 2 | 24.634 | .024 |
| Brown-Forsythe | 4.428 | 2 | 39.971 | .018 |
| Interest in research | Welch | 20.520 | 2 | 28.281 | .000 |
| Brown-Forsythe | 17.239 | 2 | 70.766 | .000 |
| Interest in publishing | Welch | 11.180 | 2 | 25.995 | .000 |
| Brown-Forsythe | 10.945 | 2 | 48.643 | .000 |
| a. Asymptotically F distributed. | |  |  |  |  |

| **Descriptives** | | | | | | | | | |
| --- | --- | --- | --- | --- | --- | --- | --- | --- | --- |
|  |  | N | Mean | Std. Deviation | Std. Error | 95% Confidence Interval for Mean | | Minimum | Maximum |
|  |  | Lower Bound | Upper Bound |
| The importance of research | Under 30 | 26 | 3.7692 | .71036 | .13931 | 3.4823 | 4.0562 | 2.00 | 5.00 |
| 30-40 | 69 | 4.0870 | .63568 | .07653 | 3.9342 | 4.2397 | 3.00 | 5.00 |
| 41-50 | 33 | 3.9091 | .76500 | .13317 | 3.6378 | 4.1803 | 2.00 | 5.00 |
| Above 50 | 20 | 4.1500 | .67082 | .15000 | 3.8360 | 4.4640 | 3.00 | 5.00 |
| Total | 148 | 4.0000 | .69007 | .05672 | 3.8879 | 4.1121 | 2.00 | 5.00 |
| The importance of publishing | Under 30 | 26 | 3.6923 | .73589 | .14432 | 3.3951 | 3.9895 | 2.00 | 5.00 |
| 30-40 | 69 | 4.1014 | .62178 | .07485 | 3.9521 | 4.2508 | 3.00 | 5.00 |
| 41-50 | 33 | 3.7879 | .92728 | .16142 | 3.4591 | 4.1167 | 1.00 | 5.00 |
| Above 50 | 20 | 4.0500 | .68633 | .15347 | 3.7288 | 4.3712 | 3.00 | 5.00 |
| Total | 148 | 3.9527 | .74079 | .06089 | 3.8324 | 4.0730 | 1.00 | 5.00 |
| Interest in research | Under 30 | 26 | 3.4615 | .70602 | .13846 | 3.1764 | 3.7467 | 2.00 | 5.00 |
| 30-40 | 69 | 3.8696 | .76530 | .09213 | 3.6857 | 4.0534 | 2.00 | 5.00 |
| 41-50 | 33 | 3.8485 | .71244 | .12402 | 3.5959 | 4.1011 | 2.00 | 5.00 |
| Above 50 | 20 | 4.0500 | .75915 | .16975 | 3.6947 | 4.4053 | 3.00 | 5.00 |
| Total | 148 | 3.8176 | .75626 | .06216 | 3.6947 | 3.9404 | 2.00 | 5.00 |
| Interest in publishing | Under 30 | 26 | 3.3846 | .85215 | .16712 | 3.0404 | 3.7288 | 2.00 | 5.00 |
| 30-40 | 69 | 3.7971 | .81493 | .09811 | 3.6013 | 3.9929 | 2.00 | 5.00 |
| 41-50 | 33 | 3.6970 | .88335 | .15377 | 3.3837 | 4.0102 | 1.00 | 5.00 |
| Above 50 | 20 | 3.9000 | .78807 | .17622 | 3.5312 | 4.2688 | 3.00 | 5.00 |
| Total | 148 | 3.7162 | .84145 | .06917 | 3.5795 | 3.8529 | 1.00 | 5.00 |

| **Test of Homogeneity of Variances** | | | | |
| --- | --- | --- | --- | --- |
|  | Levene Statistic | df1 | df2 | Sig. |
| The importance of research | .335 | 3 | 144 | .800 |
| The importance of publishing | 2.662 | 3 | 144 | .050 |
| Interest in research | .204 | 3 | 144 | .893 |
| Interest in publishing | .209 | 3 | 144 | .890 |

| **ANOVA** | | | | | | |
| --- | --- | --- | --- | --- | --- | --- |
|  |  | Sum of Squares | df | Mean Square | F | Sig. |
| The importance of research | Between Groups | 2.629 | 3 | .876 | 1.873 | .137 |
| Within Groups | 67.371 | 144 | .468 |  |  |
| Total | 70.000 | 147 |  |  |  |
| The importance of publishing | Between Groups | 4.375 | 3 | 1.458 | 2.753 | .045 |
| Within Groups | 76.293 | 144 | .530 |  |  |
| Total | 80.669 | 147 |  |  |  |
| Interest in research | Between Groups | 4.594 | 3 | 1.531 | 2.775 | .044 |
| Within Groups | 79.480 | 144 | .552 |  |  |
| Total | 84.074 | 147 |  |  |  |
| Interest in publishing | Between Groups | 3.998 | 3 | 1.333 | 1.918 | .129 |
| Within Groups | 100.083 | 144 | .695 |  |  |
| Total | 104.081 | 147 |  |  |  |

| **Robust Tests of Equality of Means** | | | | | |
| --- | --- | --- | --- | --- | --- |
|  |  | Statistica | df1 | df2 | Sig. |
| The importance of research | Welch | 1.769 | 3 | 54.364 | .164 |
| Brown-Forsythe | 1.782 | 3 | 98.794 | .156 |
| The importance of publishing | Welch | 2.664 | 3 | 53.141 | .057 |
| Brown-Forsythe | 2.532 | 3 | 95.485 | .062 |
| Interest in research | Welch | 2.881 | 3 | 56.405 | .044 |
| Brown-Forsythe | 2.842 | 3 | 99.995 | .042 |
| Interest in publishing | Welch | 1.858 | 3 | 55.699 | .147 |
| Brown-Forsythe | 1.907 | 3 | 102.570 | .133 |
| a. Asymptotically F distributed. | |  |  |  |  |

| **Descriptives** | | | | | | | | | |
| --- | --- | --- | --- | --- | --- | --- | --- | --- | --- |
|  |  | N | Mean | Std. Deviation | Std. Error | 95% Confidence Interval for Mean | | Minimum | Maximum |
|  |  | Lower Bound | Upper Bound |
| The importance of research | Under 20% | 10 | 4.0000 | .94281 | .29814 | 3.3256 | 4.6744 | 2.00 | 5.00 |
| 20-40% | 21 | 4.3333 | .57735 | .12599 | 4.0705 | 4.5961 | 3.00 | 5.00 |
| 41-60% | 41 | 4.1220 | .50966 | .07960 | 3.9611 | 4.2828 | 3.00 | 5.00 |
| 61-80% | 45 | 3.8444 | .63802 | .09511 | 3.6528 | 4.0361 | 3.00 | 5.00 |
| Above 80% | 31 | 3.8387 | .86011 | .15448 | 3.5232 | 4.1542 | 2.00 | 5.00 |
| Total | 148 | 4.0000 | .69007 | .05672 | 3.8879 | 4.1121 | 2.00 | 5.00 |
| The importance of publishing | Under 20% | 10 | 4.0000 | .94281 | .29814 | 3.3256 | 4.6744 | 2.00 | 5.00 |
| 20-40% | 21 | 4.2857 | .64365 | .14046 | 3.9927 | 4.5787 | 3.00 | 5.00 |
| 41-60% | 41 | 4.1463 | .57276 | .08945 | 3.9656 | 4.3271 | 3.00 | 5.00 |
| 61-80% | 45 | 3.6889 | .63325 | .09440 | 3.4986 | 3.8791 | 3.00 | 5.00 |
| Above 80% | 31 | 3.8387 | .93441 | .16782 | 3.4960 | 4.1815 | 1.00 | 5.00 |
| Total | 148 | 3.9527 | .74079 | .06089 | 3.8324 | 4.0730 | 1.00 | 5.00 |
| Interest in research | Under 20% | 10 | 3.5000 | .97183 | .30732 | 2.8048 | 4.1952 | 2.00 | 5.00 |
| 20-40% | 21 | 4.1905 | .60159 | .13128 | 3.9166 | 4.4643 | 3.00 | 5.00 |
| 41-60% | 41 | 4.0244 | .65145 | .10174 | 3.8188 | 4.2300 | 3.00 | 5.00 |
| 61-80% | 45 | 3.5556 | .65905 | .09824 | 3.3576 | 3.7536 | 2.00 | 5.00 |
| Above 80% | 31 | 3.7742 | .88354 | .15869 | 3.4501 | 4.0983 | 2.00 | 5.00 |
| Total | 148 | 3.8176 | .75626 | .06216 | 3.6947 | 3.9404 | 2.00 | 5.00 |
| Interest in publishing | Under 20% | 10 | 3.3000 | .94868 | .30000 | 2.6214 | 3.9786 | 2.00 | 5.00 |
| 20-40% | 21 | 4.1905 | .67964 | .14831 | 3.8811 | 4.4998 | 3.00 | 5.00 |
| 41-60% | 41 | 3.9756 | .72415 | .11309 | 3.7470 | 4.2042 | 2.00 | 5.00 |
| 61-80% | 45 | 3.4444 | .72474 | .10804 | 3.2267 | 3.6622 | 2.00 | 5.00 |
| Above 80% | 31 | 3.5806 | .99244 | .17825 | 3.2166 | 3.9447 | 1.00 | 5.00 |
| Total | 148 | 3.7162 | .84145 | .06917 | 3.5795 | 3.8529 | 1.00 | 5.00 |

| **Test of Homogeneity of Variances** | | | | |
| --- | --- | --- | --- | --- |
|  | Levene Statistic | df1 | df2 | Sig. |
| The importance of research | 2.703 | 4 | 143 | .033 |
| The importance of publishing | 1.616 | 4 | 143 | .173 |
| Interest in research | 3.434 | 4 | 143 | .010 |
| Interest in publishing | 2.575 | 4 | 143 | .040 |

| **ANOVA** | | | | | | |
| --- | --- | --- | --- | --- | --- | --- |
|  |  | Sum of Squares | df | Mean Square | F | Sig. |
| The importance of research | Between Groups | 4.838 | 4 | 1.210 | 2.655 | .035 |
| Within Groups | 65.162 | 143 | .456 |  |  |
| Total | 70.000 | 147 |  |  |  |
| The importance of publishing | Between Groups | 7.423 | 4 | 1.856 | 3.623 | .008 |
| Within Groups | 73.246 | 143 | .512 |  |  |
| Total | 80.669 | 147 |  |  |  |
| Interest in research | Between Groups | 8.830 | 4 | 2.208 | 4.195 | .003 |
| Within Groups | 75.244 | 143 | .526 |  |  |
| Total | 84.074 | 147 |  |  |  |
| Interest in publishing | Between Groups | 13.108 | 4 | 3.277 | 5.151 | .001 |
| Within Groups | 90.973 | 143 | .636 |  |  |
| Total | 104.081 | 147 |  |  |  |

| **Robust Tests of Equality of Means** | | | | | |
| --- | --- | --- | --- | --- | --- |
|  |  | Statistica | df1 | df2 | Sig. |
| The importance of research | Welch | 2.967 | 4 | 42.929 | .030 |
| Brown-Forsythe | 2.229 | 4 | 49.852 | .079 |
| The importance of publishing | Welch | 4.399 | 4 | 42.952 | .005 |
| Brown-Forsythe | 3.105 | 4 | 56.202 | .022 |
| Interest in research | Welch | 4.821 | 4 | 43.548 | .003 |
| Brown-Forsythe | 3.653 | 4 | 54.053 | .010 |
| Interest in publishing | Welch | 5.726 | 4 | 43.856 | .001 |
| Brown-Forsythe | 4.751 | 4 | 67.390 | .002 |
| a. Asymptotically F distributed. | |  |  |  |  |

| **Descriptives** | | | | | | | | | |
| --- | --- | --- | --- | --- | --- | --- | --- | --- | --- |
|  |  | N | Mean | Std. Deviation | Std. Error | 95% Confidence Interval for Mean | | Minimum | Maximum |
|  |  | Lower Bound | Upper Bound |
| The importance of research | Not published | 36 | 3.5556 | .69465 | .11578 | 3.3205 | 3.7906 | 2.00 | 5.00 |
| Having published locally only | 58 | 4.0000 | .59235 | .07778 | 3.8442 | 4.1558 | 3.00 | 5.00 |
| Having published Internationally | 54 | 4.2963 | .63334 | .08619 | 4.1234 | 4.4692 | 3.00 | 5.00 |
| Total | 148 | 4.0000 | .69007 | .05672 | 3.8879 | 4.1121 | 2.00 | 5.00 |
| The importance of publishing | Not published | 36 | 3.5278 | .81015 | .13503 | 3.2537 | 3.8019 | 1.00 | 5.00 |
| Having published locally only | 58 | 3.9138 | .60072 | .07888 | 3.7558 | 4.0717 | 3.00 | 5.00 |
| Having published Internationally | 54 | 4.2778 | .68451 | .09315 | 4.0909 | 4.4646 | 3.00 | 5.00 |
| Total | 148 | 3.9527 | .74079 | .06089 | 3.8324 | 4.0730 | 1.00 | 5.00 |
| Interest in research | Not published | 36 | 3.2500 | .69179 | .11530 | 3.0159 | 3.4841 | 2.00 | 5.00 |
| Having published locally only | 58 | 3.7931 | .58516 | .07683 | 3.6392 | 3.9470 | 3.00 | 5.00 |
| Having published Internationally | 54 | 4.2222 | .71814 | .09773 | 4.0262 | 4.4182 | 3.00 | 5.00 |
| Total | 148 | 3.8176 | .75626 | .06216 | 3.6947 | 3.9404 | 2.00 | 5.00 |
| Interest in publishing | Not published | 36 | 3.1389 | .79831 | .13305 | 2.8688 | 3.4090 | 1.00 | 4.00 |
| Having published locally only | 58 | 3.7069 | .64912 | .08523 | 3.5362 | 3.8776 | 2.00 | 5.00 |
| Having published Internationally | 54 | 4.1111 | .83929 | .11421 | 3.8820 | 4.3402 | 2.00 | 5.00 |
| Total | 148 | 3.7162 | .84145 | .06917 | 3.5795 | 3.8529 | 1.00 | 5.00 |

| **Test of Homogeneity of Variances** | | | | |
| --- | --- | --- | --- | --- |
|  | Levene Statistic | df1 | df2 | Sig. |
| The importance of research | 5.927 | 2 | 145 | .003 |
| The importance of publishing | 4.941 | 2 | 145 | .008 |
| Interest in research | 2.021 | 2 | 145 | .136 |
| Interest in publishing | 1.882 | 2 | 145 | .156 |

| **ANOVA** | | | | | | |
| --- | --- | --- | --- | --- | --- | --- |
|  |  | Sum of Squares | df | Mean Square | F | Sig. |
| The importance of research | Between Groups | 11.852 | 2 | 5.926 | 14.777 | .000 |
| Within Groups | 58.148 | 145 | .401 |  |  |
| Total | 70.000 | 147 |  |  |  |
| The importance of publishing | Between Groups | 12.294 | 2 | 6.147 | 13.036 | .000 |
| Within Groups | 68.375 | 145 | .472 |  |  |
| Total | 80.669 | 147 |  |  |  |
| Interest in research | Between Groups | 20.474 | 2 | 10.237 | 23.339 | .000 |
| Within Groups | 63.601 | 145 | .439 |  |  |
| Total | 84.074 | 147 |  |  |  |
| Interest in publishing | Between Groups | 20.425 | 2 | 10.212 | 17.701 | .000 |
| Within Groups | 83.656 | 145 | .577 |  |  |
| Total | 104.081 | 147 |  |  |  |

| **Robust Tests of Equality of Means** | | | | | |
| --- | --- | --- | --- | --- | --- |
|  |  | Statistica | df1 | df2 | Sig. |
| The importance of research | Welch | 13.114 | 2 | 84.551 | .000 |
| Brown-Forsythe | 14.223 | 2 | 119.041 | .000 |
| The importance of publishing | Welch | 10.979 | 2 | 81.969 | .000 |
| Brown-Forsythe | 12.128 | 2 | 107.444 | .000 |
| Interest in research | Welch | 20.549 | 2 | 84.662 | .000 |
| Brown-Forsythe | 22.801 | 2 | 123.428 | .000 |
| Interest in publishing | Welch | 15.252 | 2 | 83.769 | .000 |
| Brown-Forsythe | 17.223 | 2 | 121.511 | .000 |
| a. Asymptotically F distributed. | |  |  |  |  |

| **Group Statistics** | | | | | |
| --- | --- | --- | --- | --- | --- |
|  | Education | N | Mean | Std. Deviation | Std. Error Mean |
| The importance of research | Local | 95 | 4.0000 | .61885 | .06349 |
| Overseas | 53 | 4.0000 | .80861 | .11107 |
| The importance of publishing | Local | 95 | 3.9474 | .64195 | .06586 |
| Overseas | 53 | 3.9623 | .89791 | .12334 |
| Interest in research | Local | 95 | 3.7368 | .71772 | .07364 |
| Overseas | 53 | 3.9623 | .80771 | .11095 |
| Interest in publishing | Local | 95 | 3.6421 | .81104 | .08321 |
| Overseas | 53 | 3.8491 | .88570 | .12166 |

| **Independent Samples Test** | | | | | | | | | | |
| --- | --- | --- | --- | --- | --- | --- | --- | --- | --- | --- |
|  |  | Levene's Test for Equality of Variances | | t-test for Equality of Means | | | | | | |
|  |  | F | Sig. | t | df | Sig. (2-tailed) | Mean Difference | Std. Error Difference | 95% Confidence Interval of the Difference | |
|  |  | Lower | Upper |
| The importance of research | Equal variances assumed | 5.268 | .023 | .000 | 146 | 1.000 | .00000 | .11871 | -.23462 | .23462 |
| Equal variances not assumed |  |  | .000 | 86.432 | 1.000 | .00000 | .12794 | -.25431 | .25431 |
| The importance of publishing | Equal variances assumed | 6.864 | .010 | -.117 | 146 | .907 | -.01490 | .12743 | -.26675 | .23696 |
| Equal variances not assumed |  |  | -.107 | 82.188 | .915 | -.01490 | .13982 | -.29303 | .26324 |
| Interest in research | Equal variances assumed | .136 | .713 | -1.751 | 146 | .082 | -.22542 | .12876 | -.47989 | .02905 |
| Equal variances not assumed |  |  | -1.693 | 97.443 | .094 | -.22542 | .13316 | -.48969 | .03885 |
| Interest in publishing | Equal variances assumed | .009 | .924 | -1.440 | 146 | .152 | -.20695 | .14374 | -.49103 | .07713 |
| Equal variances not assumed |  |  | -1.404 | 99.933 | .163 | -.20695 | .14740 | -.49938 | .08548 |

| **Group Statistics** | | | | | |
| --- | --- | --- | --- | --- | --- |
|  | Having participated in research projects | N | Mean | Std. Deviation | Std. Error Mean |
| The importance of research | No | 41 | 3.7317 | .70797 | .11057 |
| Yes | 107 | 4.1028 | .65782 | .06359 |
| The importance of publishing | No | 41 | 3.7073 | .74980 | .11710 |
| Yes | 107 | 4.0467 | .71879 | .06949 |
| Interest in research | No | 41 | 3.4146 | .74080 | .11569 |
| Yes | 107 | 3.9720 | .70655 | .06830 |
| Interest in publishing | No | 41 | 3.3171 | .78864 | .12316 |
| Yes | 107 | 3.8692 | .81361 | .07865 |

| **Independent Samples Test** | | | | | | | | | | |
| --- | --- | --- | --- | --- | --- | --- | --- | --- | --- | --- |
|  |  | Levene's Test for Equality of Variances | | t-test for Equality of Means | | | | | | |
|  |  | F | Sig. | t | df | Sig. (2-tailed) | Mean Difference | Std. Error Difference | 95% Confidence Interval of the Difference | |
|  |  | Lower | Upper |
| The importance of research | Equal variances assumed | 2.491 | .117 | -3.007 | 146 | .003 | -.37110 | .12342 | -.61501 | -.12718 |
| Equal variances not assumed |  |  | -2.909 | 68.033 | .005 | -.37110 | .12755 | -.62562 | -.11658 |
| The importance of publishing | Equal variances assumed | 3.395 | .067 | -2.540 | 146 | .012 | -.33941 | .13361 | -.60347 | -.07536 |
| Equal variances not assumed |  |  | -2.493 | 69.863 | .015 | -.33941 | .13616 | -.61099 | -.06783 |
| Interest in research | Equal variances assumed | 2.621 | .108 | -4.237 | 146 | .000 | -.55733 | .13153 | -.81727 | -.29738 |
| Equal variances not assumed |  |  | -4.148 | 69.556 | .000 | -.55733 | .13435 | -.82531 | -.28934 |
| Interest in publishing | Equal variances assumed | .301 | .584 | -3.725 | 146 | .000 | -.55209 | .14820 | -.84497 | -.25920 |
| Equal variances not assumed |  |  | -3.778 | 74.597 | .000 | -.55209 | .14614 | -.84323 | -.26094 |

| **Group Statistics** | | | | | |
| --- | --- | --- | --- | --- | --- |
|  | Having been research project leader | N | Mean | Std. Deviation | Std. Error Mean |
| The importance of research | No | 90 | 3.8667 | .67375 | .07102 |
| Yes | 58 | 4.2069 | .66908 | .08785 |
| The importance of publishing | No | 90 | 3.8222 | .74318 | .07834 |
| Yes | 58 | 4.1552 | .69590 | .09138 |
| Interest in research | No | 90 | 3.6556 | .75194 | .07926 |
| Yes | 58 | 4.0690 | .69742 | .09158 |
| Interest in publishing | No | 90 | 3.5444 | .83681 | .08821 |
| Yes | 58 | 3.9828 | .78341 | .10287 |

| **Independent Samples Test** | | | | | | | | | | |
| --- | --- | --- | --- | --- | --- | --- | --- | --- | --- | --- |
|  |  | Levene's Test for Equality of Variances | | t-test for Equality of Means | | | | | | |
|  |  | F | Sig. | t | df | Sig. (2-tailed) | Mean Difference | Std. Error Difference | 95% Confidence Interval of the Difference | |
|  |  | Lower | Upper |
| The importance of research | Equal variances assumed | 1.036 | .310 | -3.007 | 146 | .003 | -.34023 | .11314 | -.56383 | -.11662 |
| Equal variances not assumed |  |  | -3.012 | 122.369 | .003 | -.34023 | .11297 | -.56386 | -.11660 |
| The importance of publishing | Equal variances assumed | .010 | .921 | -2.727 | 146 | .007 | -.33295 | .12209 | -.57424 | -.09166 |
| Equal variances not assumed |  |  | -2.766 | 127.477 | .007 | -.33295 | .12036 | -.57111 | -.09479 |
| Interest in research | Equal variances assumed | 3.338 | .070 | -3.358 | 146 | .001 | -.41341 | .12311 | -.65672 | -.17010 |
| Equal variances not assumed |  |  | -3.413 | 128.284 | .001 | -.41341 | .12111 | -.65305 | -.17377 |
| Interest in publishing | Equal variances assumed | 2.605 | .109 | -3.189 | 146 | .002 | -.43831 | .13746 | -.70999 | -.16664 |
| Equal variances not assumed |  |  | -3.235 | 127.494 | .002 | -.43831 | .13551 | -.70645 | -.17018 |
